# Supplementary material for: The secret life of garnets: a comprehensive, standardized dataset of garnet geochemical analyses integrating localities and petrogenesis
Source: Copernicus journal article supplement (doi:10.5194/essd-15-4235-2023), 2023-09-26
Supplement: Supplementary file 1 [file essd-15-4235-2023-supplement.zip]

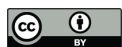

## *Supplement of*

# **The secret life of garnets: a comprehensive, standardized dataset of garnet geochemical analyses integrating localities and petrogenesis**

**Kristen Chiama et al.**

*Correspondence to:* Kristen Chiama ([kchiama@g.harvard.edu](mailto:kchiama@g.harvard.edu))

- [essd-15-4235-2023-supplement-title-page.pdf](#)
- Supplemental
  - [Supplement\\_A\\_Original\\_Garnet\\_EMPA.pdf](#)
  - [Supplement\\_B\\_Average\\_Compositions\\_Original\\_EMPA.xlsx](#)
  - [Supplement\\_C\\_Garnet\\_Dataset\\_References.pdf](#)

The copyright of individual parts of the supplement might differ from the article licence.
